# Supplementary material for: Sequencing a Strawberry Germplasm Collection Reveals New Viral Genetic Diversity and the Basis for New RT-qPCR Assays
Source: MDPI journal article supplement (doi:10.3390/v13081442), 2021-07-24
Supplement: s1 [file s1]

# ToRSV

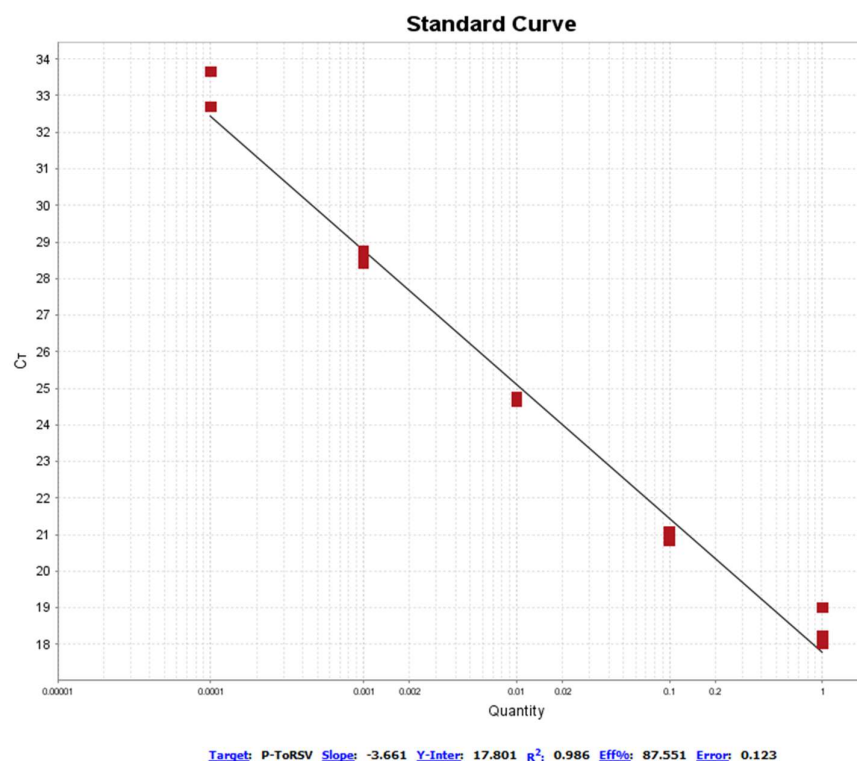

# ApMV

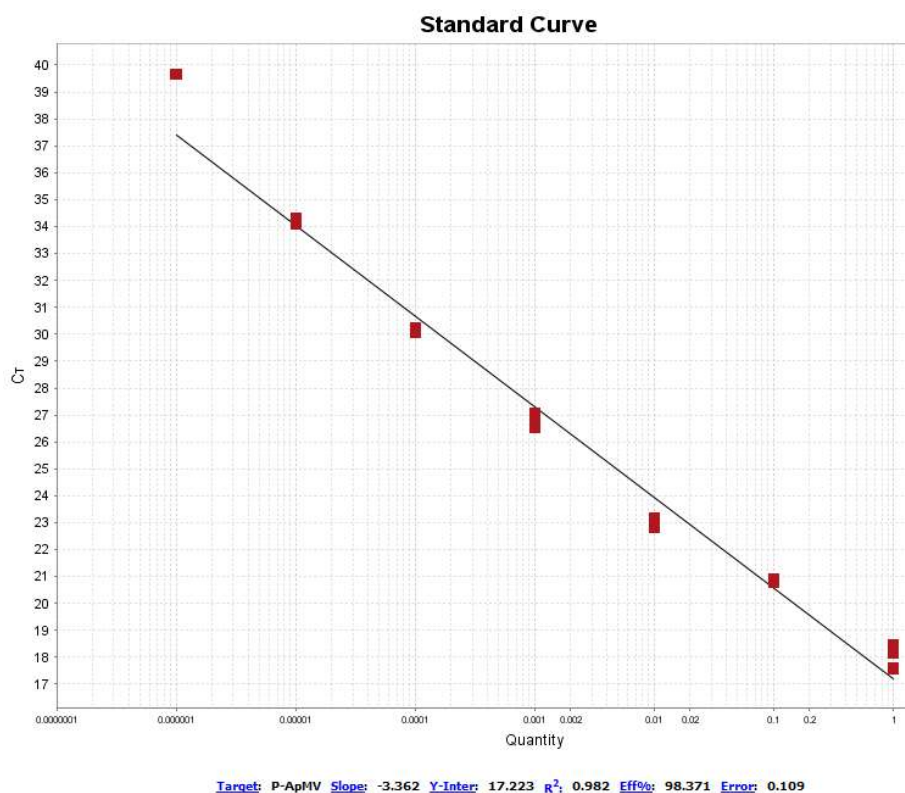

## BPYV

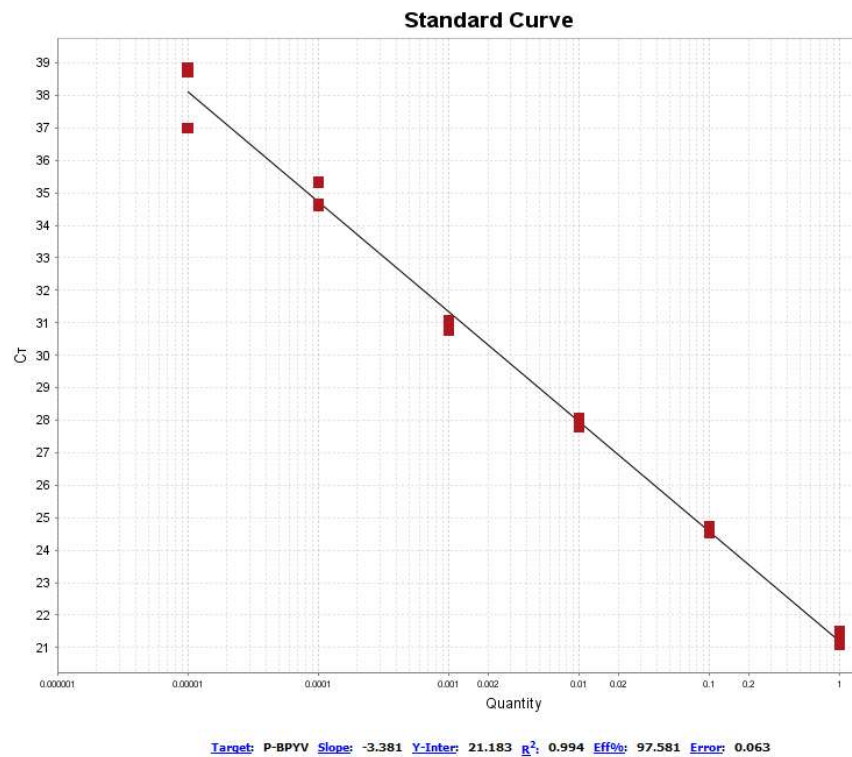

## FCCV

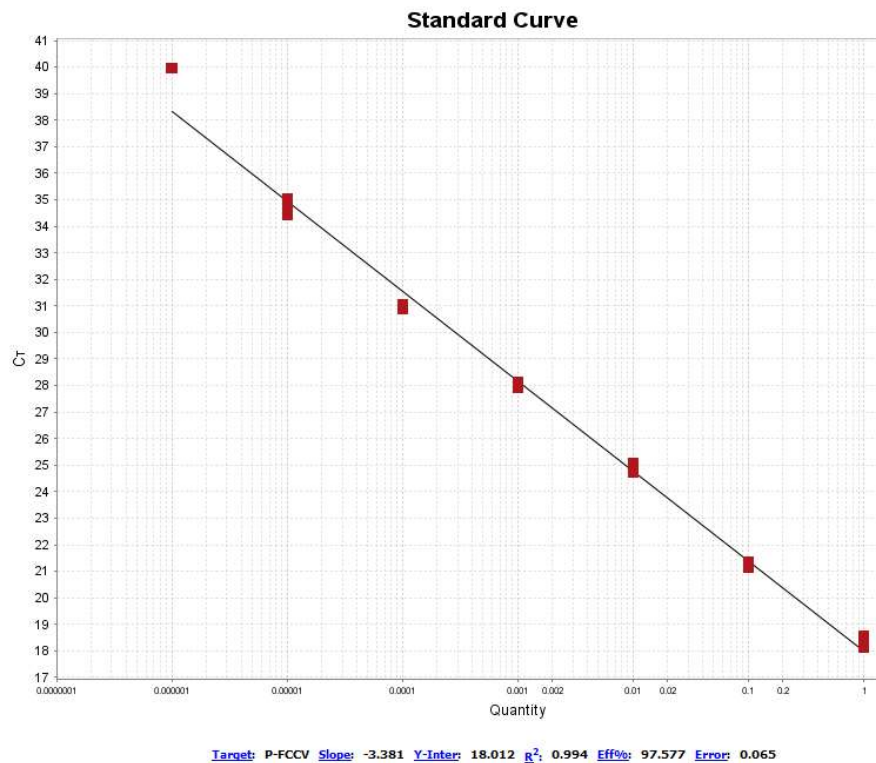

## FCILC

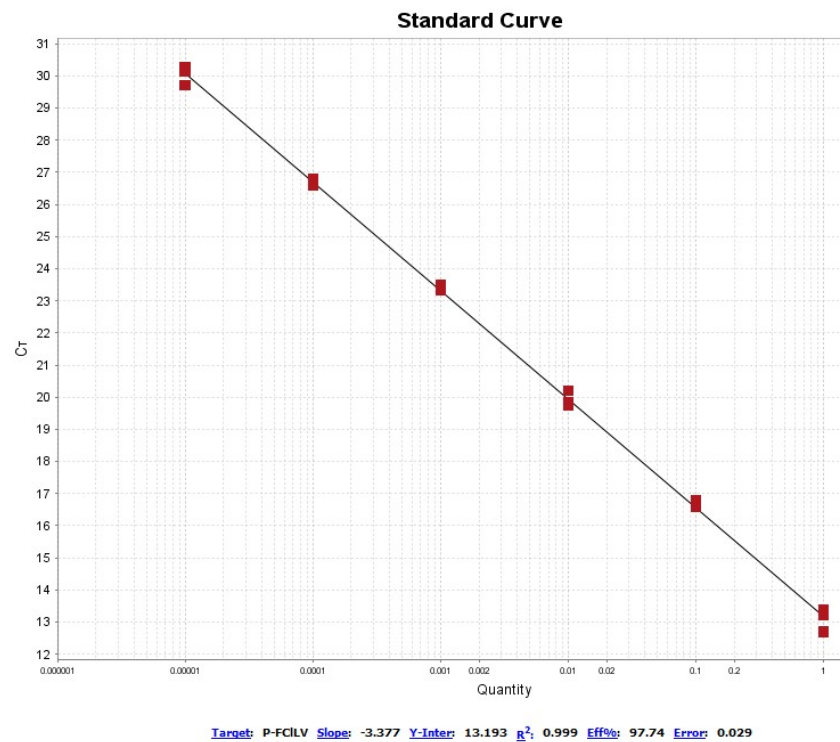

## SVBV

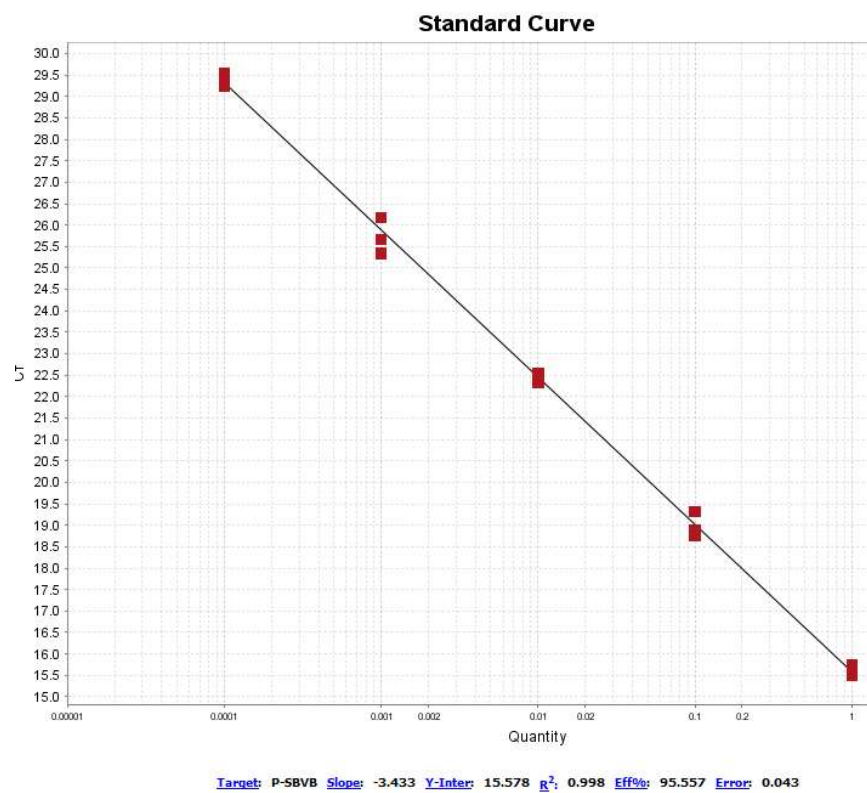

## SCFaV

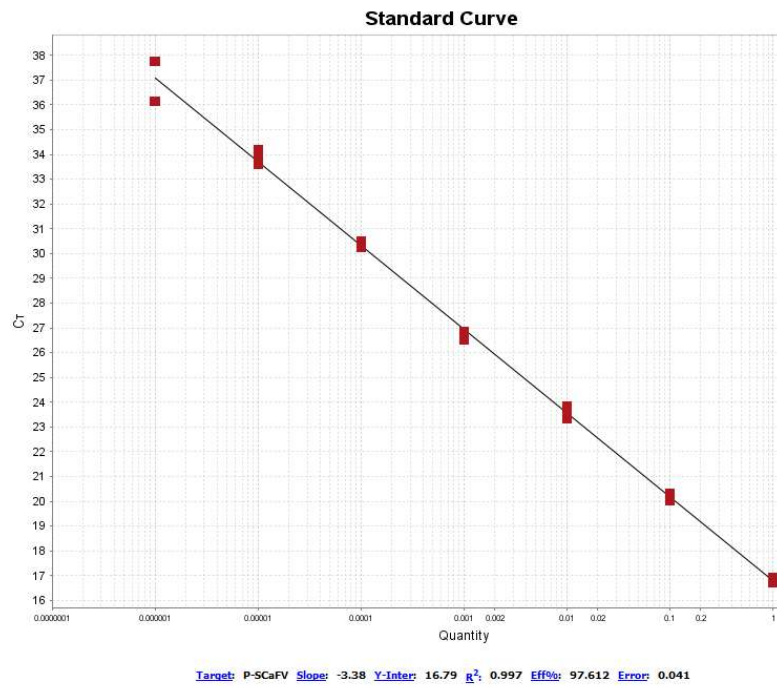

## SCrV3

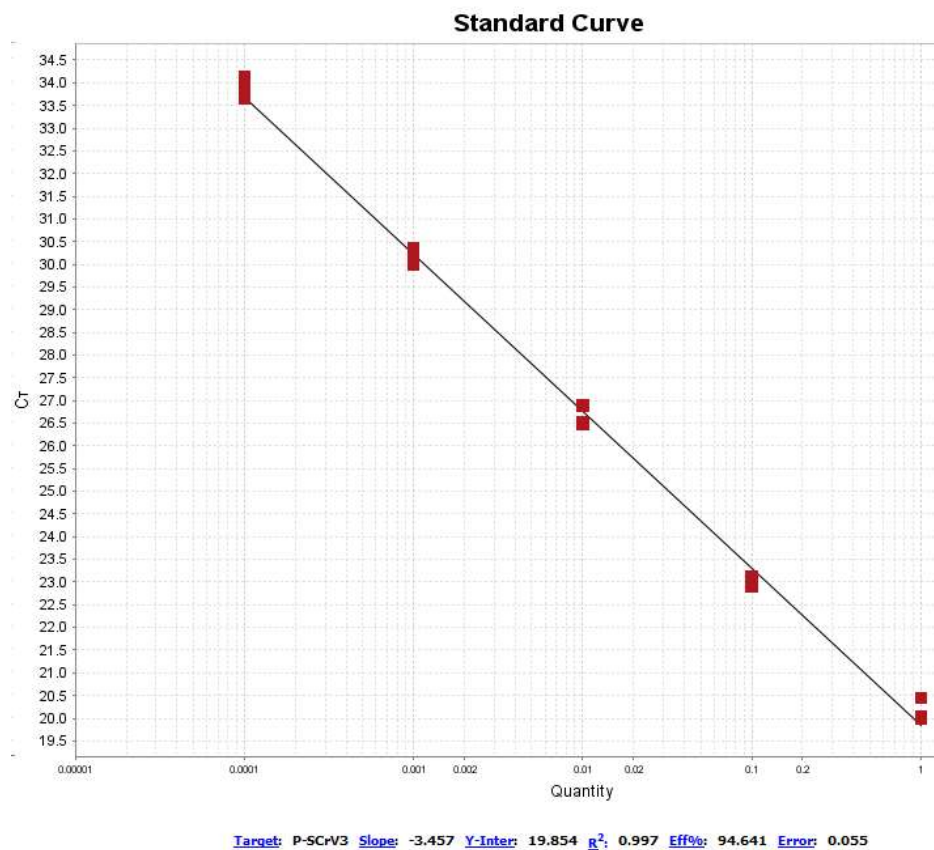



## SCrV4

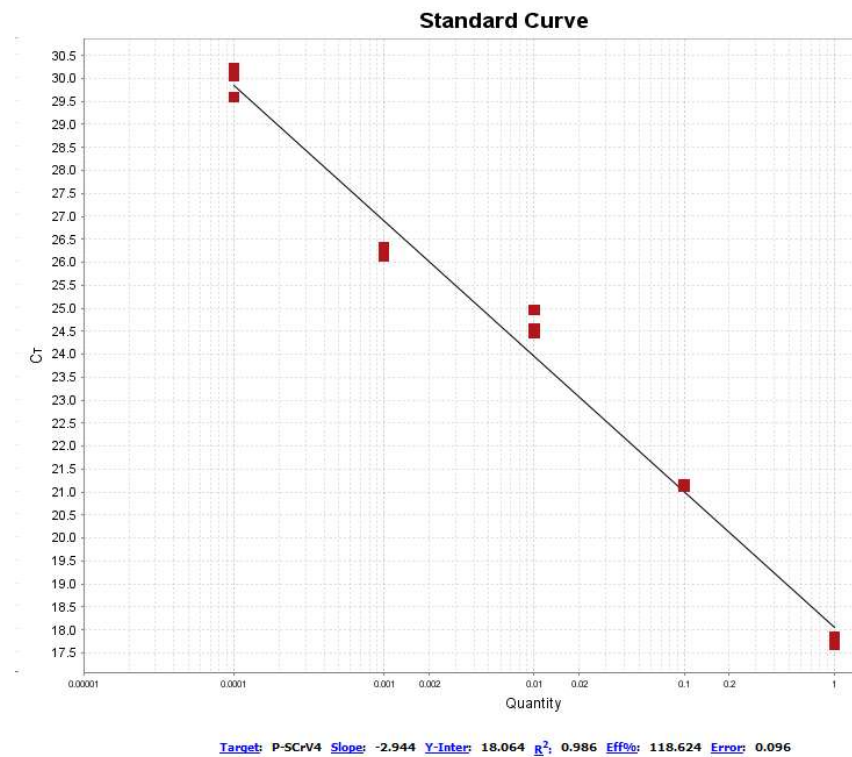

## SCV

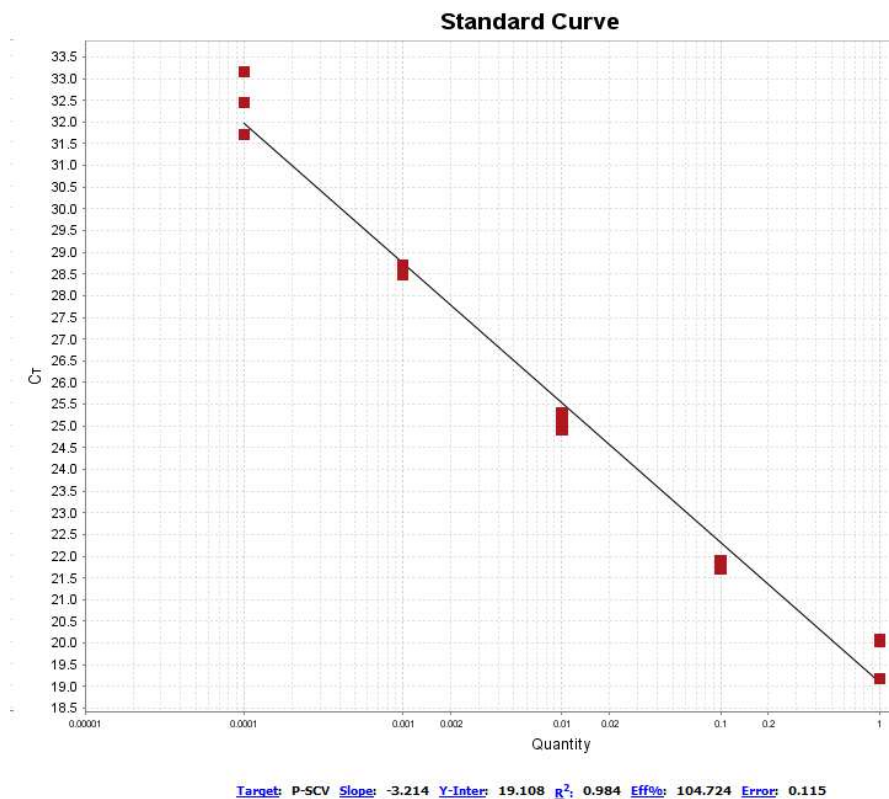

## SMoV

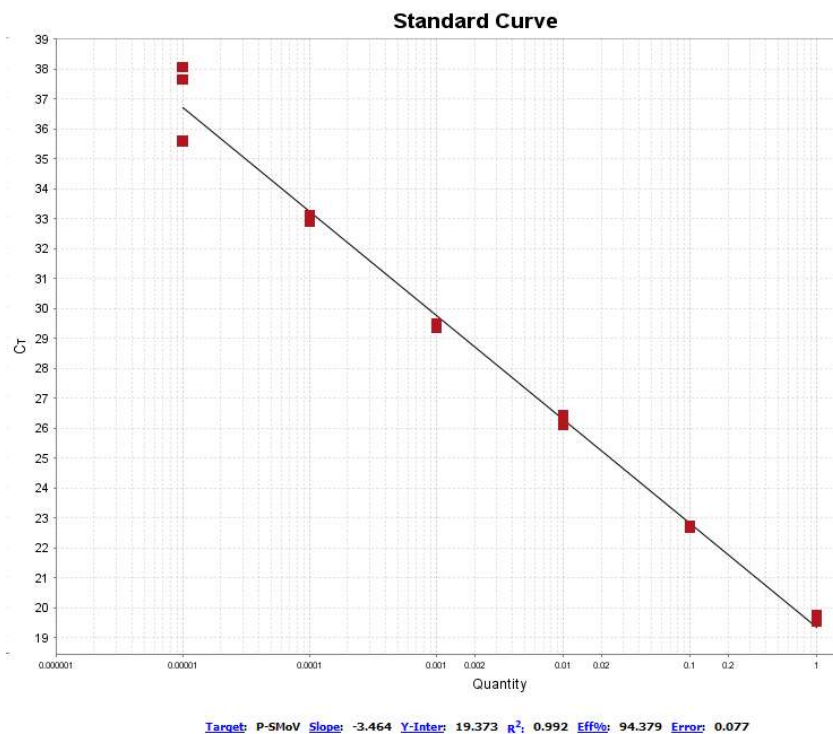

## SYMEV

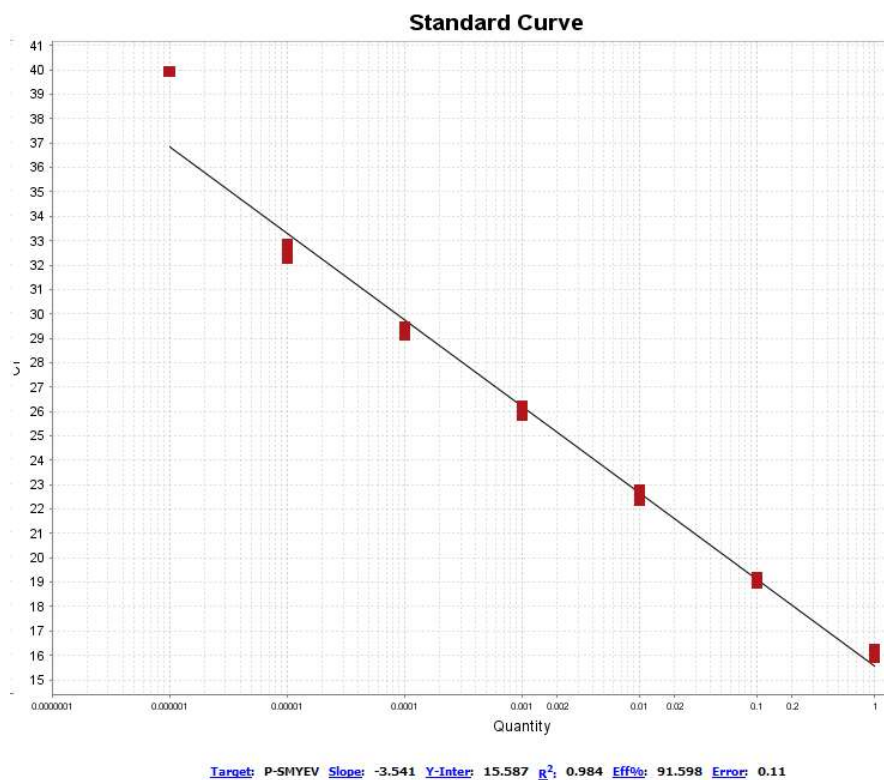

## SPV-1

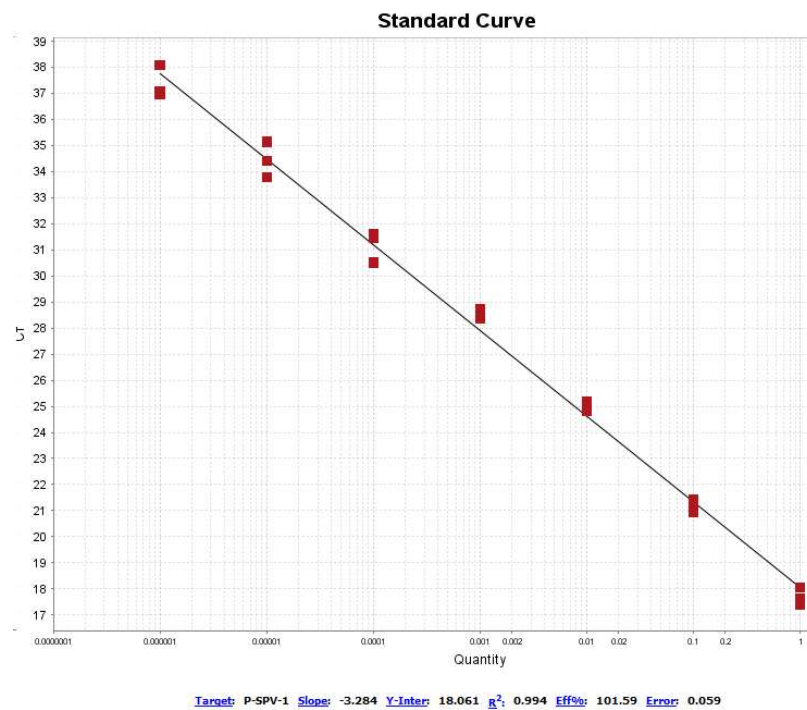

## SPaV

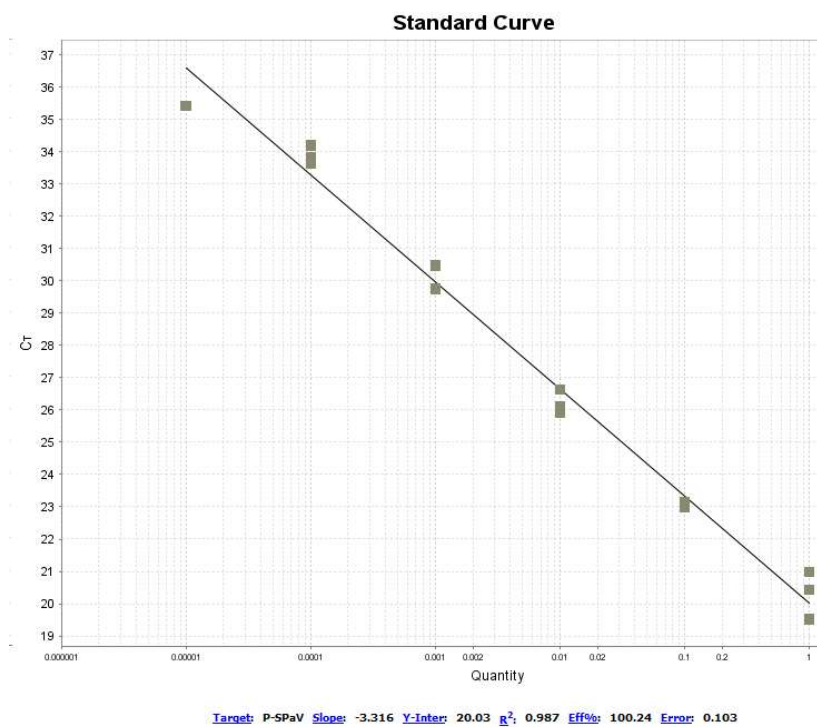

**Figure S1.** Standard curves generated from new RT-qPCR assays for strawberry viruses. Eff%, amplification efficiency in percentage;  $R^2$ , coefficient of correlation.
